# Supplementary material for: Comparison of the Journey II bicruciate stabilised (JII-BCS) and GENESIS II total knee arthroplasty for functional ability and motor impairment: the CAPAbility, blinded, randomised controlled trial
Source: HighWire-hosted journal article supplement (doi:10.1136/bmjopen-2022-061648), 2023-01-01
Supplement: bmjopen-2022-061648supp001_data_supplement.pdf [file bmjopen-2022-061648supp001_data_supplement.pdf]

**Supplement to**

**Comparison of the JOURNEY II bi-cruciate stabilised and GENESIS II**

**total knee arthroplasty for functional ability and motor impairment:**

**the CAPAbility randomised controlled trial**

**Contents**

|           |                                                                                                                                               |         |
|-----------|-----------------------------------------------------------------------------------------------------------------------------------------------|---------|
| Table S1  | OKS-APQ, EQ5D-5L and UCLA from baseline to six months after surgery (primary timepoint)                                                       | Page 2  |
| Table S2  | Walking functional ability from baseline to six months post-surgery (primary timepoint)                                                       | Page 3  |
| Table S3  | Balance functional ability from baseline to six months post-surgery (primary timepoint)                                                       | Page 4  |
| Table S4  | Double stance support (percentage of the gait cycle) from baseline to six months post-surgery (primary timepoint)                             | Page 5  |
| Table S5  | Joint parameters from baseline to six months post-surgery (primary timepoint)                                                                 | Page 6  |
| Table S6  | Muscle activity during walking from baseline to six months post-surgery (primary timepoint)                                                   | Page 7  |
| Table S7  | Balance parameters from baseline to six months post-surgery (primary timepoint)                                                               | Page 8  |
| Table S8  | Table S8. Non-operated leg cadence (steps/minute), step length and stride length from baseline to six months post-surgery (primary timepoint) | Page 9  |
| Table S9  | Post-operative clinical context: days of in-patient stay and consequences of surgery                                                          | Page 10 |
| Table S10 | Composition of out-patient physiotherapy treatment received following TKR by JII-BCS and Genesis II groups                                    | Page 11 |
| Table S11 | Complications and adverse events                                                                                                              | Page 12 |

Table S1. OKS-APQ, EQ5D-5L and UCLA from baseline to six months after surgery (primary timepoint)

|                     | Means (SDs)<br>(number of participants) |                                    |                             | Between groups comparison             |             |                                                  |             |                                       |             |                                                  |             |
|---------------------|-----------------------------------------|------------------------------------|-----------------------------|---------------------------------------|-------------|--------------------------------------------------|-------------|---------------------------------------|-------------|--------------------------------------------------|-------------|
|                     | Baseline                                | Two months<br>after surgery        | Six months<br>after surgery | Two months                            |             |                                                  |             | Six months                            |             |                                                  |             |
|                     |                                         |                                    |                             | Unadjusted<br>effect size<br>(95% CI) | p-<br>value | Adjusted <sup>a</sup><br>effect size<br>(95% CI) | p-<br>value | Unadjusted<br>effect size<br>(95% CI) | p-<br>value | Adjusted <sup>a</sup><br>effect size<br>(95% CI) | p-<br>value |
| <b>OKS-APQ</b>      |                                         |                                    |                             |                                       |             |                                                  |             |                                       |             |                                                  |             |
| JII-BCS             | 2.81 (6.63)<br>(n=40)                   | 36.09 (27.05)<br>(n=40)            | 70.83 (23.81)<br>(n=39)     | 11.63<br>(-1.87,25.14)                | 0.09        | 12.09<br>(-1.63,25.8)                            | 0.08        | 3.66<br>(-7.53,14.84)                 | 0.52        | 3.31<br>(-8.05,14.67)                            | 0.56        |
| Genesis II          | 1.41 (3.39)<br>(n=40)                   | 47.34 (32.50)<br>(n=40)            | 74.14 (25.46)<br>(n=40)     |                                       |             |                                                  |             |                                       |             |                                                  |             |
| <b>EQ5D Utility</b> |                                         |                                    |                             |                                       |             |                                                  |             |                                       |             |                                                  |             |
| JII-BCS             | 0.52 (0.16)<br>(n=40)                   | 0.74 (0.10)<br>(n=40)              | 0.90 (0.12)<br>(n=39)       | 0.05 (-<br>0.01,0.1)                  | 0.11        | 0.05<br>(0.00,0.11)                              | <b>0.05</b> | 0.00<br>(-0.06,0.05)                  | 0.89        | 0.00<br>(-0.06, 0.05)                            | 0.95        |
| Genesis II          | 0.47 (0.20)<br>(n=40)                   | 0.78 (0.14)<br>(n=40)              | 0.89 (0.13)<br>(n=40)       |                                       |             |                                                  |             |                                       |             |                                                  |             |
| <b>EQ5D VAS</b>     |                                         |                                    |                             |                                       |             |                                                  |             |                                       |             |                                                  |             |
| JII-BCS             | 59.78 (17.70)<br>(n=40)                 | 77.85 (14.12)<br>(n=40)            | 89.03 (9.44)<br>(n=39)      | 0.65<br>(-6.18,7.48)                  | 0.85        | 2.89<br>(-3.92,9.70)                             | 0.40        | -1.71<br>(-6.77,3.35)                 | 0.50        | -1.04<br>(-6.32,4.23)                            | 0.70        |
| Genesis II          | 51.30 (17.71)<br>(n=40)                 | 78.25 (16.11)<br>(n=40)            | 87.55 (12.75)<br>(n=40)     |                                       |             |                                                  |             |                                       |             |                                                  |             |
| <b>UCLA</b>         |                                         |                                    |                             |                                       |             |                                                  |             |                                       |             |                                                  |             |
| JII-BCS             | 1.10 (0.78)<br>(n=40)                   | 4.82 (1.62) <sup>b</sup><br>(n=40) | 6.87 (1.38)<br>N=38)        | 0.23<br>(-0.5,0.95)                   | 0.53        | 0.25<br>(-0.48,0.98)                             | 0.49        | -0.13 (-<br>0.74,0.48)                | 0.67        | 0.08 (-<br>0.69,0.53)                            | 0.79        |
| Genesis II          | 3.00 (0.85)<br>(n=40)                   | 5.05 (1.60) <sup>b</sup><br>(n=40) | 6.68 (1.44)<br>(n=40)       |                                       |             |                                                  |             |                                       |             |                                                  |             |

<sup>a</sup> adjusted for strata used in randomisation and for baseline scores, <sup>b</sup> median (IQR)

**Table S2. Walking functional ability from baseline to six months post-surgery (primary timepoint)**

|                                      | Means (SDs)<br>(number of participants) |                             |                             | Between groups comparison             |             |                                                  |             |                                       |             |                                       |             |
|--------------------------------------|-----------------------------------------|-----------------------------|-----------------------------|---------------------------------------|-------------|--------------------------------------------------|-------------|---------------------------------------|-------------|---------------------------------------|-------------|
|                                      | Baseline                                | Two months<br>after surgery | Six months<br>after surgery | Two months                            |             | Six months                                       |             | Unadjusted<br>effect size<br>(95% CI) | p-<br>value | Unadjusted<br>effect size<br>(95% CI) | p-<br>value |
|                                      |                                         |                             |                             | Unadjusted<br>effect size<br>(95% CI) | p-<br>value | Adjusted <sup>a</sup><br>effect size<br>(95% CI) | p-<br>value |                                       |             |                                       |             |
| <b>Walking function</b>              |                                         |                             |                             |                                       |             |                                                  |             |                                       |             |                                       |             |
| <b>Timed Up &amp; Go Test (secs)</b> |                                         |                             |                             |                                       |             |                                                  |             |                                       |             |                                       |             |
| JII-BCS                              | 11.34 (3.40)<br>(n=40)                  | 11.89 (3.92)<br>(n=37)      | 10.30 (2.90)<br>(n=35)      | 1.61<br>(-3.11,-0.1)                  | <b>0.04</b> | -1.32<br>(-2.48,-0.16)                           | <b>0.03</b> | -0.62<br>(-1.91,0.66)                 | 0.34        | -0.37<br>(-1.25,0.50)                 | 0.40        |
| Genesis II                           | 11.04 (3.33)<br>(n=40)                  | 10.42 (2.45)<br>(n=37)      | 9.76 (2.36)<br>(n=34)       |                                       |             |                                                  |             |                                       |             |                                       |             |
| <b>6-minute walk test (metres)</b>   |                                         |                             |                             |                                       |             |                                                  |             |                                       |             |                                       |             |
| JII-BCS                              | 304.03 (79.95)<br>(n=40)                | 272.20 (71.51)<br>(n=39)    | 343.41 (73.44)<br>(n=35)    | 30.12<br>(-1.16,61.39)                | 0.06        | 32.2<br>(5.74,58.65)                             | <b>0.02</b> | 22.24<br>(-9.72,54.2)                 | 0.17        | 20.19<br>(-1.60,41.98)                | 0.07        |
| Genesis II                           | 299.09 (85.69)<br>(n=40)                | 298.87 (65.23)<br>(n=37)    | 363.39 (58.85)<br>(n=34)    |                                       |             |                                                  |             |                                       |             |                                       |             |

<sup>a</sup> adjusted for strata used in randomisation and for baseline scores.

Timed Up and Go Test – seconds to rise from chair, walk 3m and return to sitting; mean of three trials. A lower value indicates better function.

Six-minute walk test - metres walked in six minutes around a 20-metre circuit. A higher value indicates greater function.

**Table S3. Balance functional ability, Star Excursion Test, from baseline to six months post-surgery (primary timepoint)**

|                                                      | Means (SDs)<br>(number of participants) |                             |                             |
|------------------------------------------------------|-----------------------------------------|-----------------------------|-----------------------------|
|                                                      | Baseline                                | Two months<br>after surgery | Six months<br>after surgery |
| <b>Anterior reach (cm)– non-operated leg</b>         |                                         |                             |                             |
| JII-BCS                                              | 40.98 (7.69)<br>(n=37)                  | 43.20 (8.11)<br>(n=33)      | 43.09 (7.58)<br>(n=31)      |
| Genesis II                                           | 40.54 (6.12)<br>(n=36)                  | 41.87 (6.18)<br>(n=34)      | 42.16 (9.37)<br>(n=32)      |
| <b>Anterior reach (cm) – operated leg</b>            |                                         |                             |                             |
| JII-BCS                                              | 41.83 (6.85)<br>(n=34)                  | 36.84 (7.45)<br>(n=32)      | 44.98 (21.54)<br>(n=30)     |
| Genesis II                                           | 37.72 (7.41)<br>(n=36)                  | 35.92 (6.94)<br>(n=35)      | 40.00 (7.47)<br>(n=32)      |
| <b>Postero-medial reach (cm) – non-operated leg</b>  |                                         |                             |                             |
| JII-BCS                                              | 63.79 (10.87)<br>(n=36)                 | 65.10 (13.59)<br>(n=33)     | 67.74 (14.59)<br>(n=31)     |
| Genesis II                                           | 63.57 (9.81)<br>(n=34)                  | 65.11 (10.78)<br>(n=34)     | 66.44 (16.73)<br>(n=32)     |
| <b>Postero-medial reach (cm) – operated leg</b>      |                                         |                             |                             |
| JII-BCS                                              | 64.18 (11.69)<br>(n=34)                 | 62.44 (12.74)<br>(n=32)     | 66.10 (14.10)<br>(n=31)     |
| Genesis II                                           | 59.32 (10.23)<br>(n=36)                 | 59.57 (8.87)<br>(n=34)      | 65.59 (11.43)<br>(n=32)     |
| <b>Postero-lateral reach (cm) – non-operated leg</b> |                                         |                             |                             |
| JII-BCS                                              | 60.10 (11.77)<br>(n=34)                 | 62.03 (15.15)<br>(n=31)     | 63.21 (14.49)<br>(n=29)     |
| Genesis II                                           | 59.86 (11.45)<br>(n=32)                 | 62.16 (11.73)<br>(n=32)     | 62.81 (16.63)<br>(n=30)     |
| <b>Postero-lateral reach (cm) – operated leg</b>     |                                         |                             |                             |
| JII-BCS                                              | 58.73 (11.01)<br>(n=32)                 | 57.78 (14.08)<br>(n=29)     | 62.83 (14.86)<br>(n=30)     |
| Genesis II                                           | 55.39 (10.78)<br>(n=33)                 | 55.19 (8.02)<br>(n=31)      | 60.19 (12.70)<br>(n=30)     |

<sup>a</sup> adjusted for strata used in randomisation and for baseline scores.

No statistical analysis as insufficient number of participants could undertake the Star Excursion Test.

**Table S4. Double stance support (percentage of the gait cycle) from baseline to six months post-surgery (primary timepoint)**

|                                             | Means (SDs)<br>(number of participants) |                             |                             | Between groups comparison             |             |                                                  |             |                                       |             |                                                  |             |
|---------------------------------------------|-----------------------------------------|-----------------------------|-----------------------------|---------------------------------------|-------------|--------------------------------------------------|-------------|---------------------------------------|-------------|--------------------------------------------------|-------------|
|                                             | Baseline                                | Two months<br>after surgery | Six months<br>after surgery | Two months                            |             |                                                  |             | Six months                            |             |                                                  |             |
|                                             |                                         |                             |                             | Unadjusted<br>effect size<br>(95% CI) | p-<br>value | Adjusted <sup>a</sup><br>effect size<br>(95% CI) | p-<br>value | Unadjusted<br>effect size<br>(95% CI) | p-<br>value | Adjusted <sup>a</sup><br>effect size<br>(95% CI) | p-<br>value |
| <b>Double stance support (% gait cycle)</b> |                                         |                             |                             |                                       |             |                                                  |             |                                       |             |                                                  |             |
| JII-BCS                                     | 0.30 (0.07)<br>(n=39)                   | 0.32 (0.11)<br>(n=37)       | 0.25 (0.08)<br>(n=35)       | -0.02<br>(-0.06,0.02)                 | 0.33        | -0.03<br>(-0.07,0.00)                            | 0.07        | -0.01<br>(-0.04,0.02)                 | 0.60        | 0.00<br>(-0.02,0.02)                             | 0.69        |
| Genesis II                                  | 0.32 (0.09)<br>(n=40)                   | 0.30 (0.07)<br>(n=37)       | 0.25 (0.05)<br>(n=34)       |                                       |             |                                                  |             |                                       |             |                                                  |             |

<sup>a</sup> adjusted for strata used in randomisation and for baseline scores.

Double stance support (% of gait cycle). A lower value indicates better performance

**Table S5. Joint parameters from baseline to six months post-surgery (primary timepoint)**

|                                                 | Means (SDs)<br>(number of participants) |                             |                             | Between groups comparison             |             |                                                  |             |                                       |             |                                                  |             |
|-------------------------------------------------|-----------------------------------------|-----------------------------|-----------------------------|---------------------------------------|-------------|--------------------------------------------------|-------------|---------------------------------------|-------------|--------------------------------------------------|-------------|
|                                                 | Baseline                                | Two months<br>after surgery | Six months<br>after surgery | Two months                            |             |                                                  |             | Six months                            |             |                                                  |             |
|                                                 |                                         |                             |                             | Unadjusted<br>effect size<br>(95% CI) | p-<br>value | Adjusted <sup>a</sup><br>effect size<br>(95% CI) | p-<br>value | Unadjusted<br>effect size<br>(95% CI) | p-<br>value | Adjusted <sup>a</sup><br>effect size<br>(95% CI) | p-<br>value |
| <b>During walking</b>                           |                                         |                             |                             |                                       |             |                                                  |             |                                       |             |                                                  |             |
| <b>Hip ROM (degrees)</b>                        |                                         |                             |                             |                                       |             |                                                  |             |                                       |             |                                                  |             |
| JII-BCS                                         | 40.00 (6.04)<br>(n=39)                  | 38.90 (5.44)<br>(n=38)      | 41.56 (6.01)<br>(n=35)      | 2.24<br>(-0.48,4.95)                  | 0.11        | 1.93<br>(-0.20,4.06)                             | 0.07        | 3.01<br>(0.20,5.82)                   | <b>0.04</b> | 1.64<br>(-0.11,3.39)                             | 0.07        |
| Genesis II                                      | 40.31 (5.93)<br>(n=40)                  | 41.03 (6.15)<br>(n=37)      | 44.44 (5.48)<br>(n=34)      |                                       |             |                                                  |             |                                       |             |                                                  |             |
| <b>Ankle ROM (degrees)</b>                      |                                         |                             |                             |                                       |             |                                                  |             |                                       |             |                                                  |             |
| JII-BCS                                         | 24.84 (6.57)<br>(n=39)                  | 21.69 (4.54)<br>(n=38)      | 24.54 (6.63)<br>(n=35)      | 0.75<br>(-1.21,2.71)                  | 0.45        | 1.36<br>(0.22,2.94)                              | 0.09        | -1.37<br>(-4.01,1.28)                 | 0.31        | 0.08<br>(-1.89,2.04)                             | 0.94        |
| Genesis II                                      | 23.10 (5.52)<br>(n=40)                  | 22.43 (3.76)<br>(n=37)      | 23.22 (3.77)<br>(n=34)      |                                       |             |                                                  |             |                                       |             |                                                  |             |
| <b>Knee peak extension moment (Nm/Kg)</b>       |                                         |                             |                             |                                       |             |                                                  |             |                                       |             |                                                  |             |
| JII-BCS                                         | -0.34 (0.09)<br>(n=37)                  | -0.30 (0.10)<br>(n=38)      | -0.41 (0.08)<br>(n=34)      | -0.03<br>(-0.08,0.01)                 | 0.16        | -0.03<br>(-0.07,0.02)                            | 0.22        | -0.02<br>(-0.05,0.02)                 | 0.45        | -0.02<br>(-0.05,0.02)                            | 0.35        |
| Genesis II                                      | -0.32 (0.08)<br>(n=40)                  | -0.33 (0.10)<br>(n=37)      | -0.42 (0.08)<br>(n=34)      |                                       |             |                                                  |             |                                       |             |                                                  |             |
| <b>Knee peak flexion moment (Nm/Kg)</b>         |                                         |                             |                             |                                       |             |                                                  |             |                                       |             |                                                  |             |
| JII-BCS                                         | 0.52 (0.25)<br>(n=37)                   | 0.38 (0.22)<br>(n=38)       | 0.55 (0.27)<br>(n=34)       | -0.06<br>(-0.16,0.04)                 | 0.22        | -0.06<br>(-0.15,0.04)                            | 0.26        | 0.11<br>(-0.23,0.02)                  | 0.10        | -0.07<br>(-0.19,0.05)                            | 0.22        |
| Genesis II                                      | 0.44 (0.21)<br>(n=40)                   | 0.34 (0.21)<br>(n=37)       | 0.45 (0.25)<br>(n=34)       |                                       |             |                                                  |             |                                       |             |                                                  |             |
| <b>During stepping onto a stair</b>             |                                         |                             |                             |                                       |             |                                                  |             |                                       |             |                                                  |             |
| <b>Peak knee angular velocity (degrees/sec)</b> |                                         |                             |                             |                                       |             |                                                  |             |                                       |             |                                                  |             |
| JII-BCS                                         | 221.70 (88.35)<br>(n=37)                | 198.09 (62.56)<br>(n=34)    | 271.84 (95.48)<br>(n=32)    | 54.31<br>(16.67,91.96)                | <b>0.01</b> | 51.63<br>(15.36,87.89)                           | <b>0.01</b> | 50.01<br>(5.97,94.04)                 | <b>0.03</b> | 35.15<br>(-3.09,73.39)                           | 0.07        |
| Genesis II                                      | 243.74 (84.05)<br>(n=38)                | 251.04 (87.88)<br>(n=34)    | 318.82 (71.32)<br>(n=30)    |                                       |             |                                                  |             |                                       |             |                                                  |             |

<sup>a</sup> adjusted for strata used in randomisation and for baseline scores. Higher values for measures indicate better movement.

**Table S6. Muscle activity during walking from baseline to six months post-surgery (primary timepoint)**

|                                                                     | Means (SDs)<br>(number of participants) |                             |                             | Between groups comparison             |             |                                                  |             |                                       |             |                                                  |             |
|---------------------------------------------------------------------|-----------------------------------------|-----------------------------|-----------------------------|---------------------------------------|-------------|--------------------------------------------------|-------------|---------------------------------------|-------------|--------------------------------------------------|-------------|
|                                                                     | Baseline                                | Two months<br>after surgery | Six months<br>after surgery | Two months                            |             |                                                  |             | Six months                            |             |                                                  |             |
|                                                                     |                                         |                             |                             | Unadjusted<br>effect size<br>(95% CI) | p-<br>value | Adjusted <sup>a</sup><br>effect size<br>(95% CI) | p-<br>value | Unadjusted<br>effect size<br>(95% CI) | p-<br>value | Adjusted <sup>a</sup><br>effect size<br>(95% CI) | p-<br>value |
| <b>Peak activation Vastus Medialis (% gait cycle)</b>               |                                         |                             |                             |                                       |             |                                                  |             |                                       |             |                                                  |             |
| JII-BCS                                                             | 28.62 (27.23)<br>n=39                   | 25.42 (24.93)<br>n=38       | 23.20 (22.72)<br>n=35       | -1.22<br>(-12.1,9.65)                 | 0.82        | -1.13<br>(-11.98,9.72)                           | 0.84        | 1.86<br>(-9.45,13.16)                 | 0.74        | 1.4<br>(-9.43,12.22)                             | 0.80        |
| Genesis II                                                          | 30.10 (27.73)<br>n=40                   | 23.18 (22.66)<br>n=38       | 24.64 (24.94)<br>n=33       |                                       |             |                                                  |             |                                       |             |                                                  |             |
| <b>Peak activation Vastus Lateralis (% gait cycle)</b>              |                                         |                             |                             |                                       |             |                                                  |             |                                       |             |                                                  |             |
| JII-BCS                                                             | 18.44 (12.15)<br>n=39                   | 17.29 (11.51)<br>n=38       | 13.03 (5.61)<br>n=35        | 1.20<br>(-5.67,8.07)                  | 0.73        | 1.11<br>(-5.78,8.01)                             | 0.75        | 5.59<br>(-1.52,12.71)                 | 0.12        | 5.63<br>(-1.65,12.9)                             | 0.13        |
| Genesis II                                                          | 20.23 (20.35)<br>n=40                   | 18.47 (17.46)<br>n=38       | 18.79 (19.89)<br>n=33       |                                       |             |                                                  |             |                                       |             |                                                  |             |
| <b>Peak activation Tibialis Anterior (% gait cycle)</b>             |                                         |                             |                             |                                       |             |                                                  |             |                                       |             |                                                  |             |
| JII-BCS                                                             | 23.46 (24.74)<br>n=39                   | 18.97 (20.91)<br>n=38       | 15.20 (14.27)<br>n=35       | 0.47<br>(-9.18,10.13)                 | 0.92        | 0.54<br>(-9.21,10.28)                            | 0.91        | 4.68<br>(-3.92,13.28)                 | 0.28        | 6.06<br>(-2.14,14.26)                            | 0.14        |
| Genesis II                                                          | 28.88 (27.88)<br>n=40                   | 19.82 (20.76)<br>n=38       | 19.61 (20.32)<br>n=33       |                                       |             |                                                  |             |                                       |             |                                                  |             |
| <b>Peak activation Biceps Femoris (% gait cycle)</b>                |                                         |                             |                             |                                       |             |                                                  |             |                                       |             |                                                  |             |
| JII-BCS                                                             | 25.03 (25.32)<br>n=39                   | 21.87 (21.34)<br>n=38       | 35.77 (34.01)<br>n=35       | 6.76<br>(-5.49,19.01)                 | 0.28        | 5.71<br>(-6.42,17.84)                            | 0.35        | -9.78<br>(-25.33,5.76)                | 0.21        | -10.97<br>(-26.69,4.74)                          | 0.17        |
| Genesis II                                                          | 29.98 (28.00)<br>n=40                   | 29.16 (31.55)<br>n=38       | 25.30 (28.86)<br>n=33       |                                       |             |                                                  |             |                                       |             |                                                  |             |
| <b>Peak activation Lateral head of Gastrocnemius (% gait cycle)</b> |                                         |                             |                             |                                       |             |                                                  |             |                                       |             |                                                  |             |
| JII-BCS                                                             | 24.67 (17.24)<br>n=39                   | 23.87 (19.34)<br>n=38       | 20.66 (15.99)<br>n=35       | -1.18<br>(-8.9,6.53)                  | 0.76        | -1.01<br>(-8.55,6.52)                            | 0.79        | -1.84<br>(-8.61,4.93)                 | 0.59        | -1.89<br>(-8.79,5.01)                            | 0.59        |
| Genesis II                                                          | 25.23 (22.36)<br>n=40                   | 23.39 (14.60)<br>n=38       | 20.00 (13.80)<br>n=33       |                                       |             |                                                  |             |                                       |             |                                                  |             |

<sup>a</sup> adjusted for strata used in randomisation and for baseline scores

**Table S7. Balance parameters from baseline to six months post-surgery (primary timepoint)**

|                                                                       | Means (SDs)<br>(number of participants) |                             |                             | Between groups comparison             |             |                                                  |             |                                       |             |                                                  |             |
|-----------------------------------------------------------------------|-----------------------------------------|-----------------------------|-----------------------------|---------------------------------------|-------------|--------------------------------------------------|-------------|---------------------------------------|-------------|--------------------------------------------------|-------------|
|                                                                       | Baseline                                | Two months<br>after surgery | Six months<br>after surgery | Two months                            |             |                                                  |             | Six months                            |             |                                                  |             |
|                                                                       |                                         |                             |                             | Unadjusted<br>effect size<br>(95% CI) | p-<br>value | Adjusted <sup>a</sup><br>effect size<br>(95% CI) | p-<br>value | Unadjusted<br>effect size<br>(95% CI) | p-<br>value | Adjusted <sup>a</sup><br>effect size<br>(95% CI) | p-<br>value |
| <b>Can stand for 10 secs only on operated leg, eyes open (number)</b> |                                         |                             |                             |                                       |             |                                                  |             |                                       |             |                                                  |             |
| JII-BCS                                                               | 13/40 (32.5%)                           | 13/39 (33.3%)               | 15/35 (42.9%)               | 0.92<br>(0.34,2.49)                   | 0.88        | 1.17<br>(0.34,4.07)                              | 0.80        | 0.56<br>(0.20,1.51)                   | 0.249       | 0.62<br>(0.17,2.28)                              | 0.47        |
| Genesis                                                               | 10/40 (25.0%)                           | 11/37 (29.7%)               | 10/34 (29.4%)               |                                       |             |                                                  |             |                                       |             |                                                  |             |
| II                                                                    |                                         |                             |                             |                                       |             |                                                  |             |                                       |             |                                                  |             |
| <b>Seconds standing only on operated leg, eyes open (secs)</b>        |                                         |                             |                             |                                       |             |                                                  |             |                                       |             |                                                  |             |
| JII-BCS                                                               | 205.04 (176.11)<br>(n=38)               | 215.39 (99.27)<br>(n=39)    | 235.48 (176.94)<br>(n=35)   | 7.00<br>(-48.53,62.53)                | 0.80        | 23.72<br>(-10.93,58.37)                          | 0.18        | 82.42<br>(-147.17,-17.67)             | <b>0.01</b> | -59.91<br>(-105.98,-13.85)                       | <b>0.01</b> |
| Genesis                                                               | 188.25 (125.93)<br>(n=40)               | 226.09 (137.15)<br>(n=36)   | 158.14 (65.40)<br>(n=34)    |                                       |             |                                                  |             |                                       |             |                                                  |             |
| II                                                                    |                                         |                             |                             |                                       |             |                                                  |             |                                       |             |                                                  |             |
| <b>COP path length standing on both legs, eyes closed (mm)</b>        |                                         |                             |                             |                                       |             |                                                  |             |                                       |             |                                                  |             |
| JII-BCS                                                               | 205.04 (176.11)<br>(n=38)               | 215.39 (99.27)<br>(n=39)    | 235.48 (176.94)<br>(n=35)   | 7.00<br>(-48.53,62.53)                | 0.80        | 23.72<br>(-10.93,58.37)                          | 0.18        | 82.42<br>(-147.17,-17.67)             | <b>0.01</b> | -59.91<br>(-105.98,-13.85)                       | <b>0.01</b> |
| Genesis                                                               | 188.25 (125.93)<br>(n=40)               | 226.09 (137.15)<br>(n=36)   | 158.14 (65.40)<br>(n=34)    |                                       |             |                                                  |             |                                       |             |                                                  |             |
| II                                                                    |                                         |                             |                             |                                       |             |                                                  |             |                                       |             |                                                  |             |

<sup>a</sup> adjusted for strata used in randomisation and for baseline scores

Resultant centre of pressure path length (COP cm) in double stance with eyes closed: lower path length indicates better balance ability.

**Table S8. Non-operated leg cadence (steps/minute), step length and stride length from baseline to six months post-surgery (primary timepoint)**

|                      | Means (SDs)<br>(number of participants) |                             |                             |
|----------------------|-----------------------------------------|-----------------------------|-----------------------------|
|                      | Baseline                                | Two months<br>after surgery | Six months after<br>surgery |
| <b>Cadence</b>       |                                         |                             |                             |
| JII-BCS              | 107.37<br>(10.62)<br>N=39               | 103.09 (13.21)<br>N=37      | 113.09 (9.51)<br>N=35       |
| Genesis II           | 102.7(10.8<br>3) n=40                   | 105.25(10.21)<br>n=37       | 112.98(9.71) n=34           |
| <b>Step length</b>   |                                         |                             |                             |
| JII-BCS              | 0.53(0.08)<br>n=39                      | 0.5(0.09) n=37              | 0.56(0.1) n=35              |
| Genesis II           | 0.54(0.09)<br>n=40                      | 0.55(0.08) n=37             | 0.6(0.08) n=34              |
| <b>Stride length</b> |                                         |                             |                             |
| JII-BCS              | 1.06(0.17)<br>n=39                      | 1.04(0.18) n=37             | 1.15(0.21) n=35             |
| Genesis II           | 1.08(0.17)<br>n=40                      | 1.11(0.15) n=37             | 1.2(0.16) n=34              |

Cadence (Steps/min), step length (m), and stride length (m) of non operative limb

**Table S9. Post-operative clinical context: days of in-patient stay and consequences of surgery**

|                                                       | <b>JII-BCS<br/>Number (%)</b> | <b>Genesis II<br/>Number (%)</b> | <b>Effect size<br/>(95% CI)</b> | <b>p-value</b>     |
|-------------------------------------------------------|-------------------------------|----------------------------------|---------------------------------|--------------------|
| <b>Length of in-patient stay</b>                      |                               |                                  |                                 |                    |
| Three days                                            | 14 (35%)                      | 13 (33%)                         |                                 |                    |
| Four days                                             | 21 (53%)                      | 21 (53%)                         |                                 |                    |
| Five days                                             | 4 (10%)                       | 5 (13%)                          |                                 |                    |
| Six days                                              | 1 (3%)                        | 1 (3%)                           | NA                              | 0.749 <sup>a</sup> |
| Median                                                | 4.00                          | 4.00                             |                                 |                    |
| (IQR)                                                 | (3.00, 4.00)                  | (3.00, 4.00)                     |                                 |                    |
| <b>Revision surgery for implant related problems*</b> |                               |                                  |                                 |                    |
| No                                                    | 40 (100%)                     | 40 (100%)                        |                                 |                    |
| Yes                                                   | 0                             | 0                                | NA                              | NA                 |
| <b>Complications</b>                                  |                               |                                  |                                 |                    |
| No                                                    | 34 (85%)                      | 35 (88%)                         | 1.00                            |                    |
| Yes                                                   | 6 (15%)                       | 5 (13%)                          | 0.83 (0.23,3.01)                | 0.780              |
| <b>Change pain medication</b>                         |                               |                                  |                                 |                    |
| No                                                    | 1 (3%)                        | 4 (10%)                          |                                 |                    |
| Yes                                                   | 39 (98%)                      | 36 (90%)                         | -7.5% (-18.0,3.0)               | 0.359 <sup>a</sup> |

NA = not appropriate; <sup>a</sup> Fisher exact test.

Length of stay, complications, revision for implant related problems and change in pain medication

\*One patient in the JII-BCS had a revision of the polyethylene component for possible infection which was never diagnosed. As this is not implant related it is not included in the table.

**Table S10.** Composition of out-patient physiotherapy treatment received following TKR by JII-BCS and Genesis II groups.

|                                                             | Number of sessions where exercises were performed: median (IQR) |                   |
|-------------------------------------------------------------|-----------------------------------------------------------------|-------------------|
|                                                             | JII-BCS (n=40)                                                  | Genesis II (n=40) |
| <b>In-patient sessions (JII-BCS n=27, Genesis II n=26)</b>  |                                                                 |                   |
| Gait re-education                                           | 2.0 (2.0, 3.0)                                                  | 2.0 (2.0, 3.0)    |
| Step exercise                                               | 1.0 (1.0, 1.0)                                                  | 1.0 (1.0, 2.0)    |
| Knee ROM flexion exercise                                   | 2.0 (2.0, 3.0)                                                  | 2.0 (2.0, 3.0)    |
| Static quadriceps exercise                                  | 2.0 (2.0, 3.0)                                                  | 2.0 (2.0, 3.0)    |
| Inner range quadriceps exercise                             | 1.0 (0.0, 1.0)                                                  | 1.0 (0.0, 2.0)    |
| Straight leg raise exercise                                 | 0.0 (1.0, 1.0)                                                  | 0.0 (1.0, 1.0)    |
| Knee extension strengthening exercise in sitting            | 1.0 (0.0, 1.0)                                                  | 1.0 (0.0, 2.0)    |
| Ice treatment                                               | 1.0 (0.0, 2.0)                                                  | 1.0 (0.0, 2.0)    |
| Advice and education                                        | 3.0 (2.0, 3.0)                                                  | 2.5 (2.0, 3.0)    |
| Other body region rehabilitation exercises                  | 3.0 (2.0, 3.0)                                                  | 2.5 (2.0, 3.0)    |
| <b>Out-patient settings (JII-BCS n=33, Genesis II n=35)</b> |                                                                 |                   |
| Other body region rehabilitation exercises                  | 1.0 (1.0, 5.0)                                                  | 1.0 (1.0, 5.0)    |
| Seat pedal exercises                                        | 0.0 (0.0, 1.0)                                                  | 0.0 (0.0, 1.0)    |
| Static bike exercises                                       | 1.0 (0.0, 3.0)                                                  | 1.0 (0.0, 5.0)    |
| Cross-trainer exercises                                     | 0.0 (0.0, 4.0)                                                  | 1.0 (0.0, 5.0)    |
| Calf stretch exercises                                      | 0.0 (0.0, 4.0)                                                  | 1.0 (0.0, 5.0)    |
| Gait re-education                                           | 1.0 (1.0, 2.0)                                                  | 1.0 (1.0, 5.0)    |
| Stair practice                                              | 1.0 (0.0, 1.0)                                                  | 1.0 (0.0, 1.0)    |
| Step exercise                                               | 1.0 (0.0, 4.0)                                                  | 1.0 (1.0, 5.0)    |
| Sit to stand exercise (without arms of chair)               | 1.0 (0.0, 4.0)                                                  | 1.0 (0.0, 5.0)    |
| Sit to stand exercise (with arms of chair)                  | 0.0 (0.0, 0.0)                                                  | 0.0 (0.0, 0.0)    |
| Knee ROM flexion (sat in chair)                             | 1.0 (1.0, 5.0)                                                  | 1.0 (1.0, 5.0)    |
| Knee strengthening extension exercise with resistance band  | 0.0 (0.0, 5.0)                                                  | 1.0 (1.0, 5.0)    |
| Static quadriceps exercise                                  | 1.0 (1.0, 1.0)                                                  | 1.0 (1.0, 4.0)    |
| Straight leg raise exercise                                 | 1.0 (1.0, 1.0)                                                  | 1.0 (1.0, 3.0)    |
| Inner range quadriceps exercise                             | 1.0 (1.0, 3.0)                                                  | 1.0 (1.0, 3.0)    |
| Proprioceptive exercises in standing                        | 0.0 (0.0, 5.0)                                                  | 1.0 (1.0, 5.0)    |
| Proprioceptive exercises in standing (with support)         | 0.0 (0.0, 0.0)                                                  | 0.0 (0.0, 0.0)    |
| Proprioceptive exercises in standing (with eyes shut)       | 0.0 (0.0, 0.0)                                                  | 0.0 (0.0, 1.0)    |
| Advice and education                                        | 0.0 (0.0, 1.0)                                                  | 0.0 (0.0, 1.0)    |
| Glutei strengthening exercise                               | 0.0 (0.0, 1.0)                                                  | 0.0 (0.0, 1.0)    |

**Table S11.** Complications and adverse events

| Complication type                                        | Numbers of participants |            |
|----------------------------------------------------------|-------------------------|------------|
|                                                          | JII-BCS                 | Genesis II |
| Post operative reaction to analgesia requiring admission |                         | 1          |
| Pulmonary embolus                                        | 1                       | 1          |
| Wound haematoma / swelling                               | 2                       | 4          |
| Postoperative bleeding requiring blood transfusion       |                         | 1          |
| Iliotibial tract discomfort                              |                         | 1          |
| Chest infection                                          | 1                       | 1          |
| Urinary tract infection                                  |                         | 1          |
| Debridement and implant retention (DAIR)                 | 1                       |            |
